# Supplementary material
Source: HighWire-hosted journal article supplement (https://jnm.snmjournals.org/highwire/filestream/95424/field_highwire_adjunct_files/0/215715_Supplemental_Data.pdf)
Supplement: 215715_Supplemental_Data.pdf [file 215715_Supplemental_Data.pdf]

**Supplemental Table 1.** Non-hematological and hematological lab results prior and after <sup>177</sup>Lu-PSMA-I&T rechallenge

| Pat ID | Hemoglobin (g/dl) |             | Thrombocytes (10 <sup>9</sup> /L) |            | WBC (10 <sup>9</sup> /L) |             | Creatinine (mg/dl) |            | Creatinine clearance (ml/min)* |       | Xerostomia |
|--------|-------------------|-------------|-----------------------------------|------------|--------------------------|-------------|--------------------|------------|--------------------------------|-------|------------|
|        | prior             | after       | prior                             | after      | prior                    | after       | prior              | after      | prior                          | after |            |
| 1      | 10.9              | <b>10.3</b> | 208                               | <b>171</b> | 5.2                      | <b>3.4</b>  | 1                  | <b>1</b>   | 71                             | 70    | -          |
| 2      | 10.5              | <b>9.9</b>  | 129                               | <b>27</b>  | 2.9                      | <b>2.6</b>  | 0.9                | <b>0.9</b> | 82                             | 82    | -          |
| 3      | 11.2              | <b>8.9</b>  | 297                               | <b>238</b> | 7.5                      | <b>4.5</b>  | 1.6                | <b>1.4</b> | 44                             | 51    | -          |
| 4      | 10.2              | <b>9.1</b>  | 117                               | <b>43</b>  | 5.9                      | <b>3.6</b>  | 0.9                | <b>0.8</b> | 67                             | 76    | Persistent |
| 5      | 9.1               | <b>7.9</b>  | 103                               | <b>88</b>  | 4                        | <b>2.4</b>  | 1.7                | <b>1.7</b> | 54                             | 54    | -          |
| 6      | 11.5              | <b>8.4</b>  | 298                               | <b>83</b>  | 6.8                      | <b>5</b>    | 0.8                | <b>0.7</b> | 81                             | 85    | Transient  |
| 7      | 11.1              | <b>11.3</b> | 336                               | <b>286</b> | 9                        | <b>4.63</b> | 1.1                | <b>1.1</b> | 62                             | 62    | -          |
| 8      | 8.9               | <b>8.2</b>  | 124                               | <b>113</b> | 3.7                      | <b>2.95</b> | 1.3                | <b>1.5</b> | 71                             | 60    | -          |

\*Creatinine Clearance was calculated after Cockcroft-Gault method.

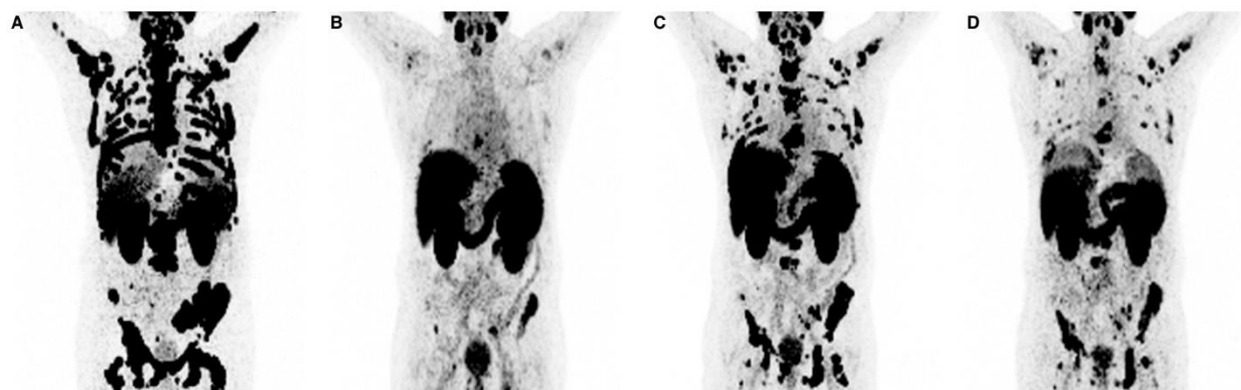

**Supplemental Figure 1.**  $^{68}\text{Ga}$ -PSMA PETs MIP images of patient 5 (**A**) at baseline, (**B**) after 6 cycles of initial  $^{177}\text{Lu}$ -PSMA RLT, (**C**) after 4.9 months of  $^{177}\text{Lu}$ -PSMA-free interval and (**D**) after 2 cycles of  $^{177}\text{Lu}$ -PSMA rechallenge. During initial  $^{177}\text{Lu}$ -PSMA RLT, patient had an excellent radiographic (A,B) and biochemical (PSA decline:  $176 \rightarrow 1$  ng/mL) antitumor response. During  $^{177}\text{Lu}$ -PSMA-free interval, the patient had a significant tumor progress (B,C) and increasing PSA levels ( $1 \rightarrow 45$  ng/mL). After  $^{177}\text{Lu}$ -PSMA rechallenge, the patient exhibited a radiographic partial response (C,D) and decreasing PSA levels ( $45 \rightarrow 8$  ng/mL). The treatment was discontinued due to high toxicity levels (anemia, thrombocytopenia, leucopenia).
